# Supplementary material for: Asymptomatic coronary artery disease in a Norwegian cohort with type 2 diabetes: a prospective angiographic study with intravascular ultrasound evaluation
Source: Springer Nature journal article supplement (doi:10.1186/s12933-019-0832-2), 2019-03-09

**Supplementary Figure 3.** Maximal intimal thickness (MIT) and Percent Atheroma volume (PAV) according to treatment group and baseline coronary artery disease (CAD) extent score. P for between group difference.

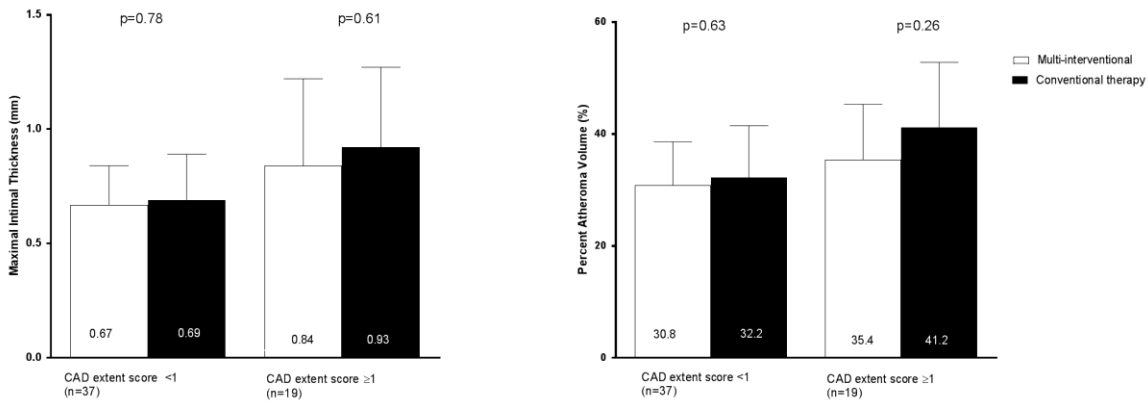

Supplement: MOESM3 [file 16536158]
